# Supplementary material for: De Novo RNA Sequencing and Expression Analysis of Aconitum carmichaelii to Analyze Key Genes Involved in the Biosynthesis of Diterpene Alkaloids
Source: MDPI journal article supplement (doi:10.3390/molecules22122155), 2017-12-05
Supplement: s1 [file s1]

**Table S2: Summary of *de novo* transcriptome assembly statistics of *Aconitum carmichaelii* resulting from the three different assemblers**

| Assembler      | Kmer | No. of contigs | N50 | Min length | Max length | Total   |
|----------------|------|----------------|-----|------------|------------|---------|
| Trintiy        | 25   | 182,928        | 905 | 224        | 13485      | 117.4e6 |
| CLC-work bench | 25   | 88,873         | 554 | 200        | 9463       | 44.1e6  |
| SOAPdenovo-    | 31   | 268,504        | 682 | 200        | 10527      | 39.53e6 |
| Trans          | 41   | 255,462        | 605 | 200        | 10099      | 40.44e6 |
|                | 51   | 253,918        | 538 | 200        | 9372       | 40.35e6 |
|                | 63   | 171,233        | 466 | 200        | 9421       | 38.39e6 |
|                | 71   | 117,985        | 454 | 200        | 9497       | 32.52e6 |
|                | 91   | 11,696         | 489 | 200        | 9450       | 4.65e6  |
