# Supplementary material for: De Novo RNA Sequencing and Expression Analysis of Aconitum carmichaelii to Analyze Key Genes Involved in the Biosynthesis of Diterpene Alkaloids
Source: MDPI journal article supplement (doi:10.3390/molecules22122155), 2017-12-05
Supplement: s1 [file s1]

Color Key  
and Histogram

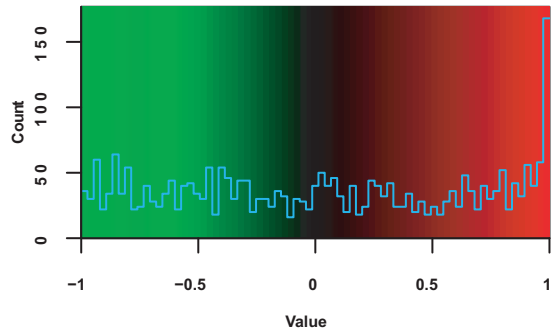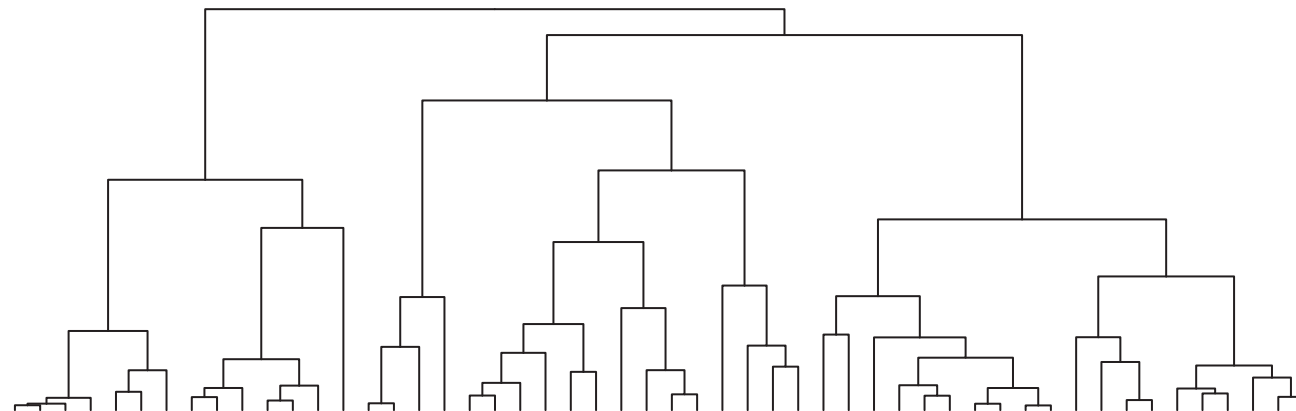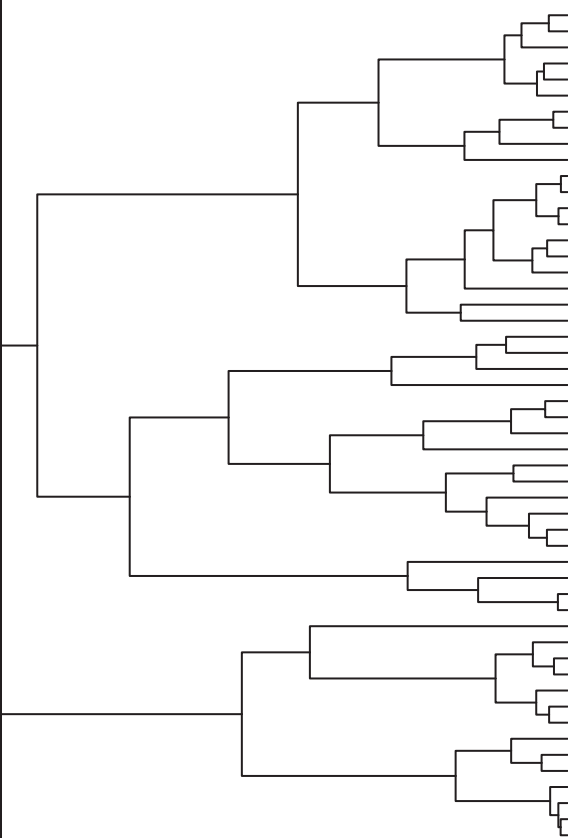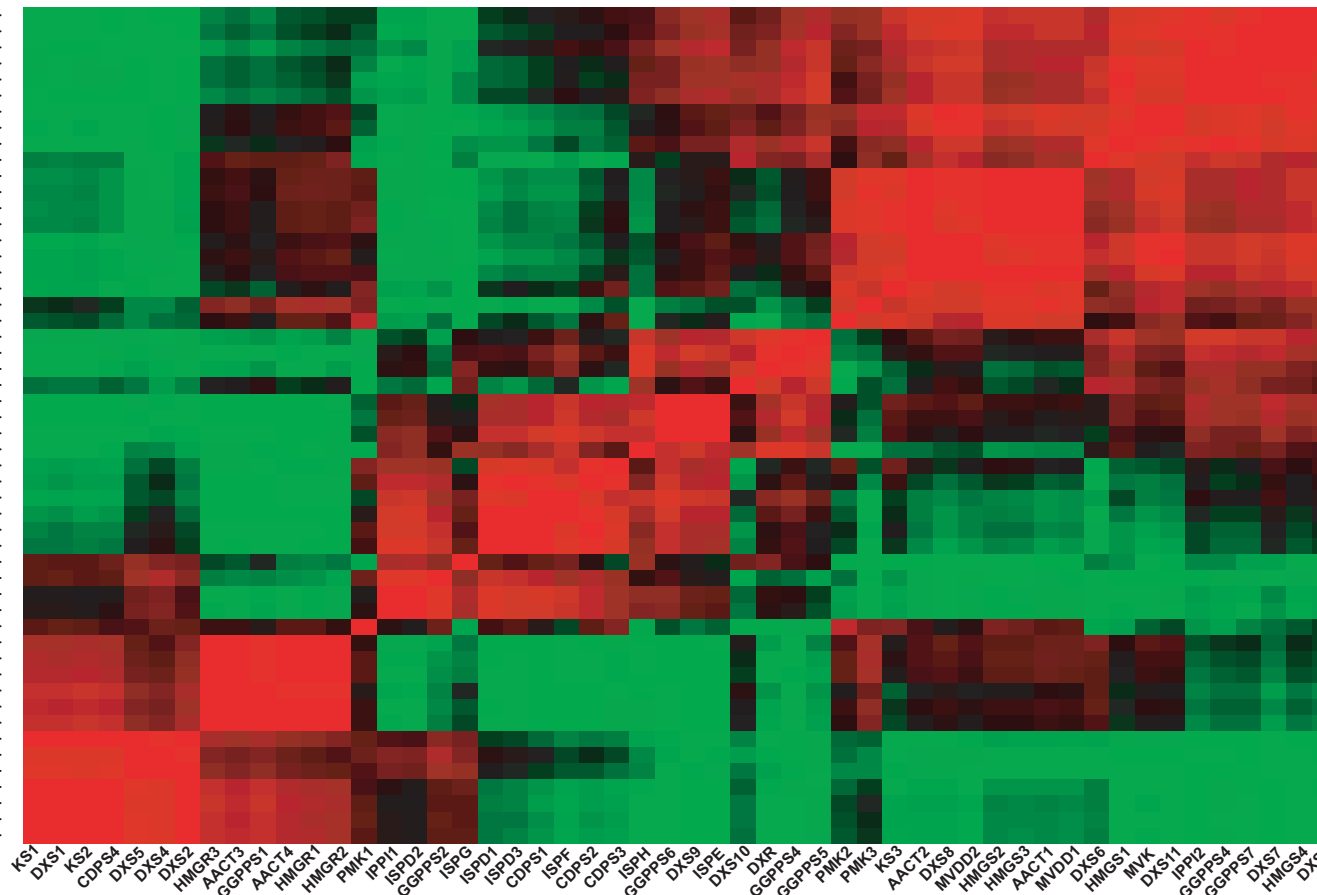

DXS3  
HMGS4  
DXS7  
GGPPS7  
GGPPS3  
IPPI2  
DXS11  
MVK  
HMGS1  
DXS6  
MVDD1  
AACT1  
HMGS3  
HMGS2  
MVDD2  
DXS8  
AACT2  
KS3  
PMK3  
PMK2  
GGPPS5  
GGPPS4  
DXR  
DXS10  
ISPE  
DXS9  
GGPPS6  
ISPH  
CDPS3  
CDPS2  
ISPF  
CDPS1  
ISPD3  
ISPD1  
ISPG  
GGPPS2  
ISPD2  
IPPI1  
PMK1  
HMGR2  
HMGR1  
AACT4  
GGPPS1  
AACT3  
HMGR3  
DXS2  
DXS4  
DXS5  
CDPS4  
KS2  
DXS1  
KS1
