# Supplementary material for: De Novo RNA Sequencing and Expression Analysis of Aconitum carmichaelii to Analyze Key Genes Involved in the Biosynthesis of Diterpene Alkaloids
Source: MDPI journal article supplement (doi:10.3390/molecules22122155), 2017-12-05
Supplement: s1 [file s1]

**Table S1 - Summary of Trimmomatic output for *Aconitum carmichaelii***

| <b>Description</b>            | <b>Flower</b>         | <b>Bud</b>            | <b>Leaf</b>          | <b>Root</b>           |
|-------------------------------|-----------------------|-----------------------|----------------------|-----------------------|
| <b>Input Read Pairs</b>       | 9,294,842             | 8,953,957             | 6,816,584            | 6,125,840             |
| <b>Both Surviving</b>         | 8,693,350<br>(93.53%) | 8,229,917<br>(91.91%) | 6,432,224<br>(94.3%) | 5,671,296<br>(92.58%) |
| <b>Forward Only Surviving</b> | 523,573<br>(5.63%)    | 644,435<br>(7.2%)     | 325,541<br>(4.78%)   | 405,374<br>(6.62%)    |
| <b>Reverse Only Surviving</b> | 47,159<br>(0.57%)     | 38,298<br>(0.43%)     | 33,314<br>(0.49%)    | 27,027<br>(0.44%)     |
| <b>Dropped</b>                | 30,760<br>(0.33 %)    | 41,307<br>(0.46%)     | 25,505<br>(0.37%)    | 22,143<br>(0.36%)     |
