# Supplementary material for: De Novo RNA Sequencing and Expression Analysis of Aconitum carmichaelii to Analyze Key Genes Involved in the Biosynthesis of Diterpene Alkaloids
Source: MDPI journal article supplement (doi:10.3390/molecules22122155), 2017-12-05
Supplement: s1 [file s1]

**Table S7: Statistics of SSRs detected in the transcriptome assembly of *A. heterophyllum***

| <b>Results of SSR searches</b>                 |       |
|------------------------------------------------|-------|
| Total number of sequences examined             | 81607 |
| Total number of identified SSRs                | 9068  |
| Number of SSR containing sequences             | 8026  |
| Number of sequences containing more than 1 SSR | 888   |
| Number of SSRs present in compound formation   | 494   |

  

| <b>Distribution of different repeat type classes</b> |      |
|------------------------------------------------------|------|
| Mono-nucleotides                                     | 5713 |
| Di-nucleotides                                       | 985  |
| Tri-nucleotides                                      | 2187 |
| Tetra-nucleotides                                    | 58   |
| Penta-nucleotides                                    | 28   |
| Hexa-nucleotides                                     | 97   |
