# Supplementary figures and images for: De Novo RNA Sequencing and Expression Analysis of Aconitum carmichaelii to Analyze Key Genes Involved in the Biosynthesis of Diterpene Alkaloids
Source: MDPI journal article supplement (doi:10.3390/molecules22122155), 2017-12-05

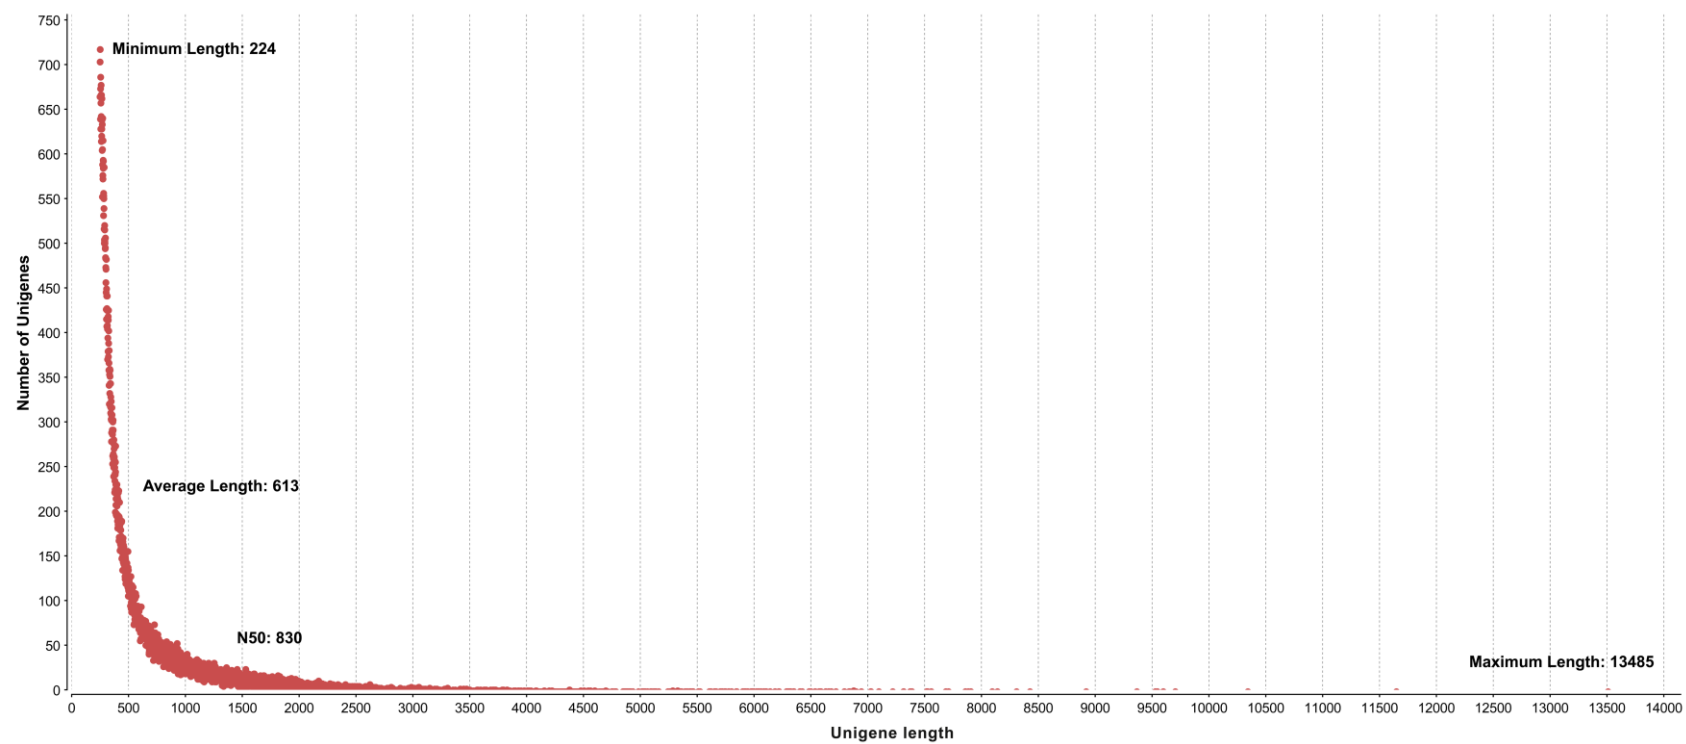

Supplement: s1 [file s1]
